# Supplementary material
Source: publisher figshare collection journal article supplement (https://acs.figshare.com/ndownloader/files/5087161)
Supplement: Supplementary file 1 [file 5087161]

 
data_complex1
 
_audit_creation_method            SHELXL-97
_chemical_name_systematic
;
 ?
;
_chemical_name_common             ?
_chemical_melting_point           ?
_chemical_formula_moiety          
 'C20 H17 Cu N3 O4, 5(H2 O)'
_chemical_formula_sum
 'C20 H27 Cu N3 O9'
_chemical_formula_weight          516.99
 
loop_
 _atom_type_symbol
 _atom_type_description
 _atom_type_scat_dispersion_real
 _atom_type_scat_dispersion_imag
 _atom_type_scat_source
 'C'  'C'   0.0033   0.0016
 'International Tables Vol C Tables 4.2.6.8 and 6.1.1.4'
 'H'  'H'   0.0000   0.0000
 'International Tables Vol C Tables 4.2.6.8 and 6.1.1.4'
 'N'  'N'   0.0061   0.0033
 'International Tables Vol C Tables 4.2.6.8 and 6.1.1.4'
 'O'  'O'   0.0106   0.0060
 'International Tables Vol C Tables 4.2.6.8 and 6.1.1.4'
 'Cu'  'Cu'   0.3201   1.2651
 'International Tables Vol C Tables 4.2.6.8 and 6.1.1.4'
 
_symmetry_cell_setting            Orthorhombic
_symmetry_space_group_name_Hall   '-P 2n 2c'
_symmetry_space_group_name_H-M    'Pcan'
 
loop_
 _symmetry_equiv_pos_as_xyz
 'x, y, z'
 '-x+1/2, -y+1/2, z+1/2'
 'x, -y, -z+1/2'
 '-x+1/2, y+1/2, -z'
 '-x, -y, -z'
 'x-1/2, y-1/2, -z-1/2'
 '-x, y, z-1/2'
 'x-1/2, -y-1/2, z'
 
_cell_length_a                    14.035(5)
_cell_length_b                    14.625(5)
_cell_length_c                    21.424(5)
_cell_angle_alpha                 90.00
_cell_angle_beta                  90.00
_cell_angle_gamma                 90.00
_cell_volume                      4398(2)
_cell_formula_units_Z             8
_cell_measurement_temperature     243(2)
_cell_measurement_reflns_used     255
_cell_measurement_theta_min       1.68
_cell_measurement_theta_max       30.03
 
_exptl_crystal_description        'Prism'
_exptl_crystal_colour             'blue'
_exptl_crystal_size_max           0.25
_exptl_crystal_size_mid           0.25
_exptl_crystal_size_min           0.20
_exptl_crystal_density_meas       ?
_exptl_crystal_density_diffrn     1.562
_exptl_crystal_density_method     'not measured'
_exptl_crystal_F_000              2152
_exptl_absorpt_coefficient_mu     1.051
_exptl_absorpt_correction_type    'empirical'
_exptl_absorpt_correction_T_min   0.8263
_exptl_absorpt_correction_T_max   1.0000
_exptl_absorpt_process_details    'REQABA'
 
_exptl_special_details
;
 ?
;
 
_diffrn_ambient_temperature       243(2)
_diffrn_radiation_wavelength      0.71069
_diffrn_radiation_type            MoK\a
_diffrn_radiation_source          'fine-focus sealed tube'
_diffrn_radiation_monochromator   graphite
_diffrn_measurement_device_type   'Rigaku/MSC Mercury CCD'
_diffrn_measurement_method        'omega scan'
_diffrn_detector_area_resol_mean  ?
_diffrn_standards_number          ?
_diffrn_standards_interval_count  ?
_diffrn_standards_interval_time   ?
_diffrn_standards_decay_%         ?
_diffrn_reflns_number             31605
_diffrn_reflns_av_R_equivalents   0.0343
_diffrn_reflns_av_sigmaI/netI     0.0219
_diffrn_reflns_limit_h_min        -19
_diffrn_reflns_limit_h_max        19
_diffrn_reflns_limit_k_min        -20
_diffrn_reflns_limit_k_max        14
_diffrn_reflns_limit_l_min        -30
_diffrn_reflns_limit_l_max        30
_diffrn_reflns_theta_min          1.68
_diffrn_reflns_theta_max          30.03
_reflns_number_total              5979
_reflns_number_gt                 5642
_reflns_threshold_expression      >2sigma(I)
 
_computing_data_collection        'Rigaku/MSC Mercury CCD'
_computing_cell_refinement        'Rigaku/MSC Mercury CCD'
_computing_data_reduction         ?
_computing_structure_solution     'SHELXS-97 (Sheldrick, 1997)'
_computing_structure_refinement   'SHELXL-97 (Sheldrick, 1997)'
_computing_molecular_graphics     'Ortep-3 for windows (Farrugia, 1997)'
_computing_publication_material   'Platon99 (Spek, 1999)'
 
_refine_special_details
;
 Refinement of F^2^ against ALL reflections.  The weighted R-factor wR and
 goodness of fit S are based on F^2^, conventional R-factors R are based
 on F, with F set to zero for negative F^2^. The threshold expression of
 F^2^ > 2sigma(F^2^) is used only for calculating R-factors(gt) etc. and is
 not relevant to the choice of reflections for refinement.  R-factors based
 on F^2^ are statistically about twice as large as those based on F, and R-
 factors based on ALL data will be even larger.
;
 
_refine_ls_structure_factor_coef  Fsqd
_refine_ls_matrix_type            full
_refine_ls_weighting_scheme       calc
_refine_ls_weighting_details
 'calc w=1/[\s^2^(Fo^2^)+(0.0892P)^2^+5.2423P] where P=(Fo^2^+2Fc^2^)/3'
_atom_sites_solution_primary      direct
_atom_sites_solution_secondary    difmap
_atom_sites_solution_hydrogens    geom
_refine_ls_hydrogen_treatment     mixed
_refine_ls_extinction_method      none
_refine_ls_extinction_coef        ?
_refine_ls_number_reflns          5979
_refine_ls_number_parameters      298
_refine_ls_number_restraints      0
_refine_ls_R_factor_all           0.0552
_refine_ls_R_factor_gt            0.0525
_refine_ls_wR_factor_ref          0.1580
_refine_ls_wR_factor_gt           0.1553
_refine_ls_goodness_of_fit_ref    1.083
_refine_ls_restrained_S_all       1.083
_refine_ls_shift/su_max           0.000
_refine_ls_shift/su_mean          0.000
 
loop_
 _atom_site_label
 _atom_site_type_symbol
 _atom_site_fract_x
 _atom_site_fract_y
 _atom_site_fract_z
 _atom_site_U_iso_or_equiv
 _atom_site_adp_type
 _atom_site_occupancy
 _atom_site_symmetry_multiplicity
 _atom_site_calc_flag
 _atom_site_refinement_flags
 _atom_site_disorder_assembly
 _atom_site_disorder_group
Cu1 Cu 0.373688(18) 0.145624(18) 0.110193(13) 0.02236(11) Uani 1 1 d . . .
N1 N 0.43763(12) 0.26086(12) 0.08433(8) 0.0228(3) Uani 1 1 d . . .
N2 N 0.39648(19) 0.17244(16) 0.21258(10) 0.0375(5) Uani 1 1 d . . .
N3 N 0.81264(13) 0.52283(13) 0.38328(8) 0.0237(4) Uani 1 1 d . . .
O1 O 0.74288(11) 0.30244(12) 0.11129(7) 0.0277(3) Uani 1 1 d . . .
O2 O 0.73792(13) 0.33247(14) 0.00932(9) 0.0371(4) Uani 1 1 d . . .
O3 O 0.49886(12) 0.09221(11) 0.09165(10) 0.0329(4) Uani 1 1 d . . .
O4 O 0.64749(13) 0.13081(12) 0.06637(9) 0.0325(4) Uani 1 1 d . . .
C1 C 0.39951(17) 0.34442(16) 0.08258(12) 0.0291(5) Uani 1 1 d . . .
H1 H 0.3343 0.3514 0.0888 0.035 Uiso 1 1 calc R . .
C2 C 0.45535(18) 0.42103(16) 0.07168(13) 0.0337(5) Uani 1 1 d . . .
H2 H 0.4280 0.4789 0.0700 0.040 Uiso 1 1 calc R . .
C3 C 0.55221(17) 0.40994(16) 0.06333(12) 0.0315(5) Uani 1 1 d . . .
H3 H 0.5907 0.4607 0.0564 0.038 Uiso 1 1 calc R . .
C4 C 0.59248(15) 0.32257(15) 0.06532(10) 0.0229(4) Uani 1 1 d . . .
C5 C 0.53210(14) 0.24892(14) 0.07588(9) 0.0213(4) Uani 1 1 d . . .
C6 C 0.56377(15) 0.14948(14) 0.07806(11) 0.0233(4) Uani 1 1 d . . .
C7 C 0.69998(15) 0.31587(14) 0.05986(10) 0.0244(4) Uani 1 1 d . . .
C8 C 0.4551(3) 0.1201(2) 0.24553(15) 0.0490(8) Uani 1 1 d . . .
H8 H 0.4835 0.0704 0.2258 0.059 Uiso 1 1 calc R . .
C9 C 0.4764(3) 0.1357(2) 0.30803(16) 0.0575(10) Uani 1 1 d . . .
H9 H 0.5171 0.0964 0.3293 0.069 Uiso 1 1 calc R . .
C10 C 0.4371(3) 0.2092(3) 0.33815(13) 0.0538(9) Uani 1 1 d . . .
C11 C 0.3761(2) 0.2636(3) 0.30419(17) 0.0581(10) Uani 1 1 d . . .
H11 H 0.3473 0.3139 0.3228 0.070 Uiso 1 1 calc R . .
C12 C 0.3579(3) 0.2432(2) 0.24254(16) 0.0501(7) Uani 1 1 d . . .
H12 H 0.3163 0.2809 0.2206 0.060 Uiso 1 1 calc R . .
C13 C 0.4624(3) 0.2336(3) 0.40467(14) 0.0707(14) Uani 1 1 d . . .
H13A H 0.4885 0.1802 0.4254 0.085 Uiso 1 1 calc R . .
H13B H 0.4051 0.2517 0.4268 0.085 Uiso 1 1 calc R . .
C14 C 0.5353(2) 0.3118(3) 0.40726(14) 0.0534(9) Uani 1 1 d . . .
H14A H 0.5115 0.3628 0.3829 0.064 Uiso 1 1 calc R . .
H14B H 0.5415 0.3322 0.4501 0.064 Uiso 1 1 calc R . .
C15 C 0.6337(2) 0.2849(2) 0.38274(14) 0.0399(6) Uani 1 1 d . . .
H15A H 0.6604 0.2372 0.4089 0.048 Uiso 1 1 calc R . .
H15B H 0.6278 0.2610 0.3407 0.048 Uiso 1 1 calc R . .
C16 C 0.69880(18) 0.36604(16) 0.38258(11) 0.0277(4) Uani 1 1 d . . .
C17 C 0.69790(19) 0.42764(17) 0.33312(11) 0.0330(5) Uani 1 1 d . . .
H17 H 0.6594 0.4168 0.2986 0.040 Uiso 1 1 calc R . .
C18 C 0.75425(17) 0.50491(18) 0.33548(11) 0.0309(5) Uani 1 1 d . . .
H18 H 0.7515 0.5462 0.3025 0.037 Uiso 1 1 calc R . .
C19 C 0.81528(15) 0.46325(15) 0.43072(10) 0.0256(4) Uani 1 1 d . . .
H19 H 0.8564 0.4745 0.4639 0.031 Uiso 1 1 calc R . .
C20 C 0.75890(16) 0.38514(16) 0.43220(11) 0.0270(4) Uani 1 1 d . . .
H20 H 0.7615 0.3459 0.4663 0.032 Uiso 1 1 calc R . .
O1W O 0.7388(3) -0.0397(2) 0.09251(15) 0.0758(9) Uani 1 1 d . . .
O3W O 0.6269(3) 0.2576(5) 0.2163(2) 0.151(3) Uani 1 1 d . . .
O2W O 0.6955(6) 0.0810(6) 0.2755(4) 0.214(4) Uani 1 1 d . . .
O4W O 0.5095(6) 0.4213(9) 0.2263(4) 0.258(6) Uani 1 1 d . . .
O5W O 0.3222(13) 0.4932(10) 0.2029(5) 0.381(9) Uani 1 1 d . . .
 
loop_
 _atom_site_aniso_label
 _atom_site_aniso_U_11
 _atom_site_aniso_U_22
 _atom_site_aniso_U_33
 _atom_site_aniso_U_23
 _atom_site_aniso_U_13
 _atom_site_aniso_U_12
Cu1 0.01496(16) 0.02167(17) 0.03045(18) 0.00072(9) 0.00072(9) -0.00232(8)
N1 0.0180(8) 0.0225(8) 0.0279(8) 0.0004(7) 0.0009(6) -0.0008(6)
N2 0.0482(13) 0.0335(10) 0.0309(10) -0.0011(8) -0.0054(9) -0.0130(10)
N3 0.0186(8) 0.0234(8) 0.0292(9) -0.0011(6) -0.0005(6) -0.0038(7)
O1 0.0166(7) 0.0322(8) 0.0343(8) 0.0031(6) -0.0006(6) -0.0018(6)
O2 0.0309(9) 0.0467(10) 0.0336(9) 0.0028(8) 0.0086(7) -0.0073(8)
O3 0.0217(7) 0.0213(7) 0.0557(11) 0.0006(7) 0.0034(7) -0.0015(6)
O4 0.0210(7) 0.0282(8) 0.0484(10) -0.0022(7) 0.0095(7) 0.0026(6)
C1 0.0196(10) 0.0279(10) 0.0399(12) 0.0010(9) -0.0008(9) 0.0040(8)
C2 0.0280(11) 0.0228(10) 0.0502(14) 0.0024(9) -0.0023(10) 0.0041(9)
C3 0.0287(11) 0.0236(10) 0.0423(12) 0.0035(9) -0.0030(9) -0.0042(8)
C4 0.0199(9) 0.0230(9) 0.0260(9) 0.0008(7) -0.0004(7) -0.0026(8)
C5 0.0176(8) 0.0221(9) 0.0242(8) -0.0005(7) 0.0009(7) -0.0015(7)
C6 0.0191(9) 0.0229(9) 0.0280(10) -0.0021(7) 0.0021(8) -0.0001(7)
C7 0.0191(9) 0.0217(9) 0.0324(10) -0.0002(8) 0.0012(8) -0.0034(7)
C8 0.076(2) 0.0307(12) 0.0397(14) 0.0012(11) -0.0190(14) -0.0100(14)
C9 0.082(3) 0.0482(17) 0.0429(16) 0.0117(13) -0.0237(17) -0.0256(17)
C10 0.0613(19) 0.069(2) 0.0314(12) -0.0048(13) 0.0035(13) -0.0488(18)
C11 0.059(2) 0.070(2) 0.0457(17) -0.0212(16) 0.0080(14) -0.0171(17)
C12 0.0520(16) 0.0531(18) 0.0453(16) -0.0112(14) 0.0001(13) -0.0023(14)
C13 0.074(2) 0.107(3) 0.0310(13) -0.0086(16) 0.0057(15) -0.068(2)
C14 0.0492(17) 0.077(2) 0.0342(13) -0.0207(14) 0.0102(12) -0.0407(17)
C15 0.0421(15) 0.0309(13) 0.0467(15) 0.0022(10) -0.0074(11) -0.0158(11)
C16 0.0238(11) 0.0242(10) 0.0350(11) -0.0024(8) -0.0005(8) -0.0045(8)
C17 0.0356(12) 0.0357(12) 0.0277(10) -0.0002(9) -0.0069(9) -0.0127(10)
C18 0.0312(11) 0.0337(11) 0.0278(10) 0.0034(9) -0.0042(9) -0.0097(9)
C19 0.0219(9) 0.0250(9) 0.0298(10) -0.0001(8) -0.0039(8) 0.0002(8)
C20 0.0254(10) 0.0246(10) 0.0312(10) 0.0021(8) -0.0025(8) -0.0013(8)
O1W 0.105(2) 0.0513(15) 0.0705(17) -0.0128(13) -0.0230(17) 0.0206(16)
O3W 0.108(4) 0.264(8) 0.080(3) 0.013(4) 0.009(2) -0.067(4)
O2W 0.224(8) 0.230(9) 0.187(8) -0.002(6) 0.029(6) 0.052(7)
O4W 0.191(7) 0.437(17) 0.146(7) 0.038(8) -0.023(5) -0.100(9)
O5W 0.57(2) 0.39(2) 0.185(9) 0.026(11) 0.024(13) 0.15(2)
 
_geom_special_details
;
 All esds (except the esd in the dihedral angle between two l.s. planes)
 are estimated using the full covariance matrix.  The cell esds are taken
 into account individually in the estimation of esds in distances, angles
 and torsion angles; correlations between esds in cell parameters are only
 used when they are defined by crystal symmetry.  An approximate (isotropic)
 treatment of cell esds is used for estimating esds involving l.s. planes.
;
 
loop_
 _geom_bond_atom_site_label_1
 _geom_bond_atom_site_label_2
 _geom_bond_distance
 _geom_bond_site_symmetry_2
 _geom_bond_publ_flag
Cu1 O3 1.9632(18) . ?
Cu1 O1 1.9869(17) 8_565 ?
Cu1 N1 1.9882(19) . ?
Cu1 N3 1.9947(19) 6_556 ?
Cu1 N2 2.251(2) . ?
N1 C1 1.335(3) . ?
N1 C5 1.349(3) . ?
N2 C8 1.328(4) . ?
N2 C12 1.333(4) . ?
N3 C18 1.337(3) . ?
N3 C19 1.339(3) . ?
N3 Cu1 1.9947(19) 6_666 ?
O1 C7 1.271(3) . ?
O1 Cu1 1.9869(17) 8_665 ?
O2 C7 1.231(3) . ?
O3 C6 1.271(3) . ?
O4 C6 1.232(3) . ?
C1 C2 1.387(3) . ?
C2 C3 1.381(3) . ?
C3 C4 1.398(3) . ?
C4 C5 1.389(3) . ?
C4 C7 1.517(3) . ?
C5 C6 1.521(3) . ?
C8 C9 1.391(4) . ?
C9 C10 1.368(6) . ?
C10 C11 1.377(6) . ?
C10 C13 1.511(4) . ?
C11 C12 1.378(5) . ?
C13 C14 1.535(4) . ?
C14 C15 1.529(5) . ?
C15 C16 1.498(3) . ?
C16 C20 1.386(3) . ?
C16 C17 1.391(3) . ?
C17 C18 1.380(3) . ?
C19 C20 1.390(3) . ?
C1 H1 0.93 . ?
C2 H2 0.93 . ?
C3 H3 0.93 . ?
C8 H8 0.93 . ?
C9 H9 0.93 . ? 
C11 H11 0.93 . ?
C12 H12 0.93 . ?
C13 H13A 0.97 . ?
C13 H13B 0.97 . ?
C14 H14A 0.97 . ?
C14 H14B 0.97 . ?
C15 H15A 0.97 . ?
C15 H15B 0.97 . ?
C17 H17  0.93 . ?
C18 H18  0.93 . ?
C19 H19  0.93 . ?
C20 H20  0.93 . ?
 
loop_
 _geom_angle_atom_site_label_1
 _geom_angle_atom_site_label_2
 _geom_angle_atom_site_label_3
 _geom_angle
 _geom_angle_site_symmetry_1
 _geom_angle_site_symmetry_3
 _geom_angle_publ_flag
O3 Cu1 O1 168.91(8) . 8_565 ?
O3 Cu1 N1 82.93(7) . . ?
O1 Cu1 N1 95.53(8) 8_565 . ?
O3 Cu1 N3 92.31(8) . 6_556 ?
O1 Cu1 N3 86.93(8) 8_565 6_556 ?
N1 Cu1 N3 167.59(8) . 6_556 ?
O3 Cu1 N2 98.01(9) . . ?
O1 Cu1 N2 93.05(8) 8_565 . ?
N1 Cu1 N2 93.42(8) . . ?
N3 Cu1 N2 98.60(8) 6_556 . ?
C1 N1 C5 120.58(19) . . ?
C1 N1 Cu1 127.08(15) . . ?
C5 N1 Cu1 111.79(14) . . ?
C8 N2 C12 116.4(3) . . ?
C8 N2 Cu1 120.4(2) . . ?
C12 N2 Cu1 123.1(2) . . ?
C18 N3 C19 118.1(2) . . ?
C18 N3 Cu1 119.56(16) . 6_666 ?
C19 N3 Cu1 121.38(15) . 6_666 ?
C7 O1 Cu1 111.62(14) . 8_665 ?
C6 O3 Cu1 115.18(15) . . ?
N1 C1 C2 121.2(2) . . ?
C3 C2 C1 118.9(2) . . ?
C2 C3 C4 120.1(2) . . ?
C5 C4 C3 117.8(2) . . ?
C5 C4 C7 124.71(19) . . ?
C3 C4 C7 117.32(19) . . ?
N1 C5 C4 121.39(19) . . ?
N1 C5 C6 114.00(18) . . ?
C4 C5 C6 124.61(19) . . ?
O4 C6 O3 125.7(2) . . ?
O4 C6 C5 118.96(19) . . ?
O3 C6 C5 115.30(19) . . ?
O2 C7 O1 126.0(2) . . ?
O2 C7 C4 119.0(2) . . ?
O1 C7 C4 114.49(19) . . ?
N2 C8 C9 123.3(3) . . ?
C10 C9 C8 119.8(3) . . ?
C9 C10 C11 117.0(3) . . ?
C9 C10 C13 122.4(4) . . ?
C11 C10 C13 120.5(4) . . ?
C10 C11 C12 119.8(4) . . ?
N2 C12 C11 123.6(4) . . ?
C10 C13 C14 111.5(3) . . ?
C15 C14 C13 113.4(3) . . ?
C16 C15 C14 110.4(3) . . ?
C20 C16 C17 117.3(2) . . ?
C20 C16 C15 122.0(2) . . ?
C17 C16 C15 120.6(2) . . ?
C18 C17 C16 119.8(2) . . ?
N3 C18 C17 122.7(2) . . ?
N3 C19 C20 122.4(2) . . ?
C16 C20 C19 119.7(2) . . ?
N1 C1 H1 119.39 . . ?
C2 C1 H1 119.42 . . ?
C1 C2 H2 120.56 . . ?
C3 C2 H2 120.55 . . ?
C2 C3 H3 119.92 . . ?
C4 C3 H3 119.98 . . ?
N2 C8 H8 118.33 . . ?
C9 C8 H8 118.26 . . ?
C8 C9 H9 120.17 . . ?
C10 C9 H9 120.11 . . ?
C10 C11 H11 120.08 . . ?
C12 C11 H11 120.13 . . ?
N2 C12 H12 118.15 . . ?
C11 C12 H12 118.18 . . ?
C10 C13 H13A 109.28 . . ?
C10 C13 H13B 109.29 . . ?
C14 C13 H13A 109.35 . . ?
C14 C13 H13B 109.35 . . ?
H13A C13 H13B 107.99 . . ?
C13 C14 H14A 108.90 . . ?
C13 C14 H14B 108.87 . . ?
C15 C14 H14A 108.91 . . ?
C15 C14 H14B 108.88 . . ?
H14A C14 H14B 107.69 . . ?
C14 C15 H15A 109.60 . . ?
C14 C15 H15B 109.56 . . ?
C16 C15 H15A 109.60 . . ?
C16 C15 H15B 109.61 . . ?
H15A C15 H15B 108.08 . . ?
C16 C17 H17 120.06 . . ?
C18 C17 H17 120.12 . . ?
N3 C18 H18 118.67 . . ?
C17 C18 H18 118.68 . . ?
N3 C19 H19 118.81 . . ?
C20 C19 H19 118.76 . . ?
C16 C20 H20 120.16 . . ?
C19 C20 H20 120.19 . . ?
 
_diffrn_measured_fraction_theta_max    0.913
_diffrn_reflns_theta_full              30.23
_diffrn_measured_fraction_theta_full   0.913
_refine_diff_density_max    1.070
_refine_diff_density_min   -0.712
_refine_diff_density_rms    0.105
